# Supplementary material for: Chair interconversion and reactivity of mannuronic acid esters
Source: Royal Society of Chemistry journal article supplement (doi:10.1039/c3ob41747f), 2013-01-01
Supplement: c3ob41747f.pdf [file c3ob41747f.pdf]

# Chair interconversion and reactivity of mannuronic acid esters

Jerk Rönnols,<sup>a</sup> Marthe T. C. Walvoort,<sup>b</sup> Gijsbert A. van der Marel,<sup>b</sup>

Jeroen D. C. Codée,<sup>b</sup> and Göran Widmalm<sup>a</sup>

<sup>a</sup>Department of Organic Chemistry  
Stockholm University  
S-106 91 Stockholm (Sweden)

<sup>b</sup>Leiden Institute of Chemistry  
Leiden University, P.O. Box 9502  
2300 RA Leiden (The Netherlands)

Supporting information

## Table of contents

|                                                            |           |
|------------------------------------------------------------|-----------|
| DNMR spectra of compound <b>1</b>                          | <b>S1</b> |
| DNMR spectra of compound <b>4</b>                          | <b>S2</b> |
| DNMR spectra of compound <b>5</b>                          | <b>S3</b> |
| DNMR spectra of compound <b>6</b>                          | <b>S4</b> |
| DNMR spectra of compound <b>7</b>                          | <b>S5</b> |
| NMR spectra from competition between <b>1</b> and <b>2</b> | <b>S6</b> |

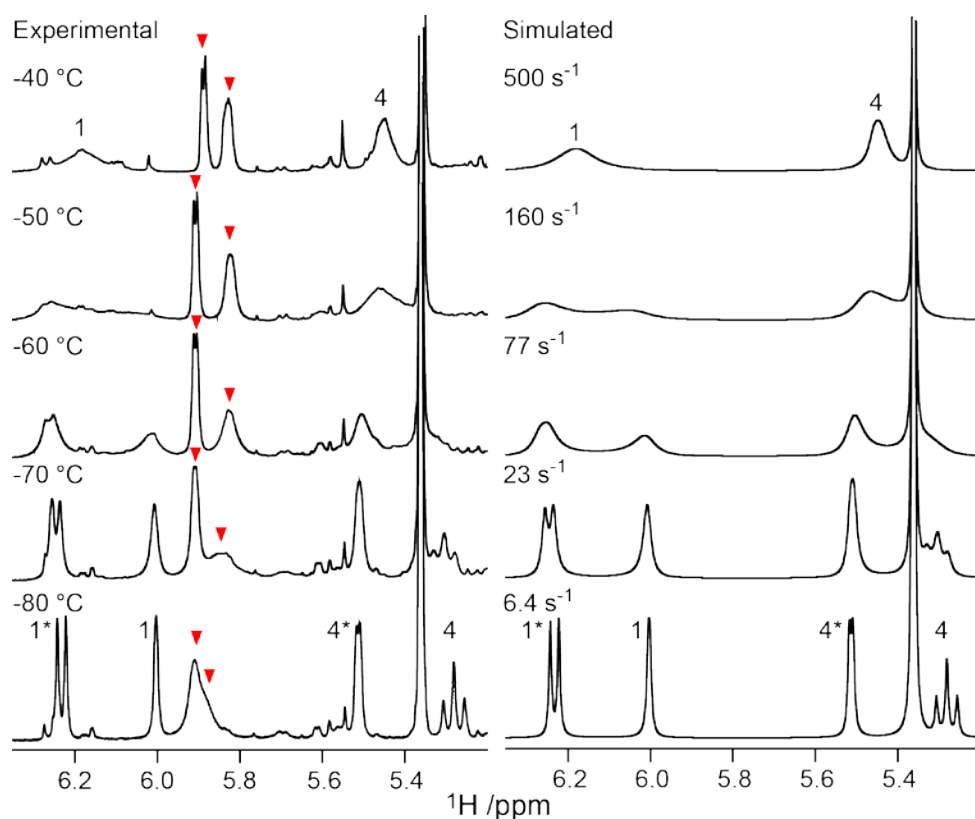

**Figure S1.** Experimental and simulated  $^1\text{H}$  NMR spectra of the H1 and H4 signals of anomeric triflate **1**. Signals arising from the  $^1\text{C}_4$  conformer are marked with asterisks. Signals marked with red triangles pointing downwards are unknown by-products formed upon activation. The signal at 5.36 ppm originates from residual dichloromethane-*d*.

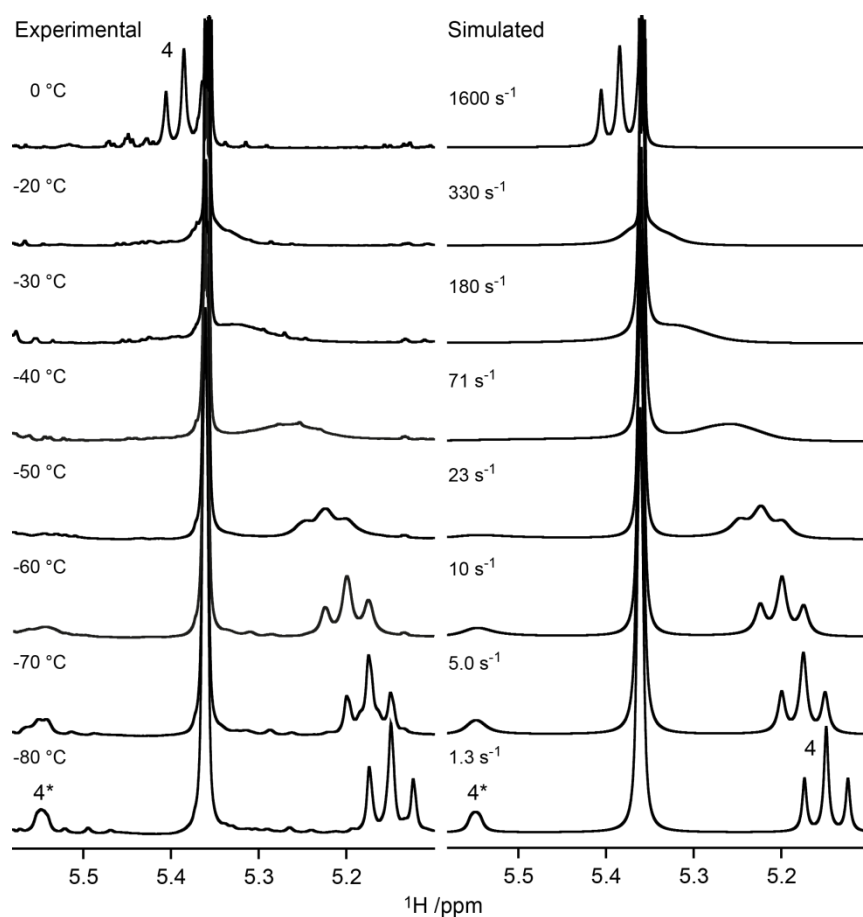

**Figure S2.** Experimental and simulated  $^1\text{H}$  NMR spectra of the signals from H4 of methyl glycoside **4**. The signal arising from the  $^1\text{C}_4$  conformer is marked with an asterisk. The signal at 5.36 ppm originates from residual dichloromethane-*d*.

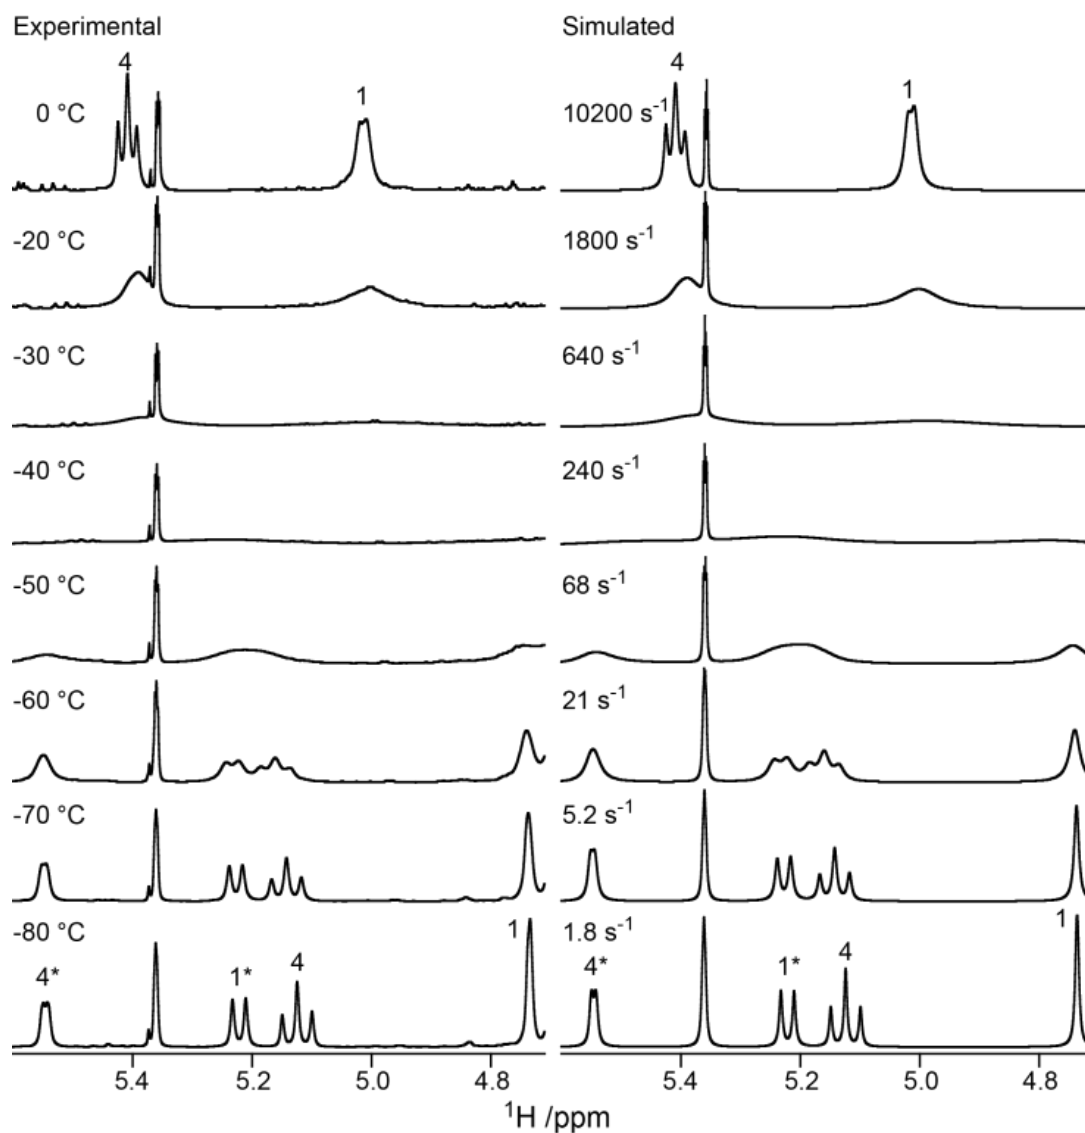

**Figure S3.** Experimental and simulated <sup>1</sup>H NMR spectra of the H1 and H4 signals of methyl glycoside **5**. The signals arising from the <sup>1</sup>C<sub>4</sub> conformer are marked with asterisks (\*). The signal at 5.36 ppm originates from residual dichloromethane-*d*.

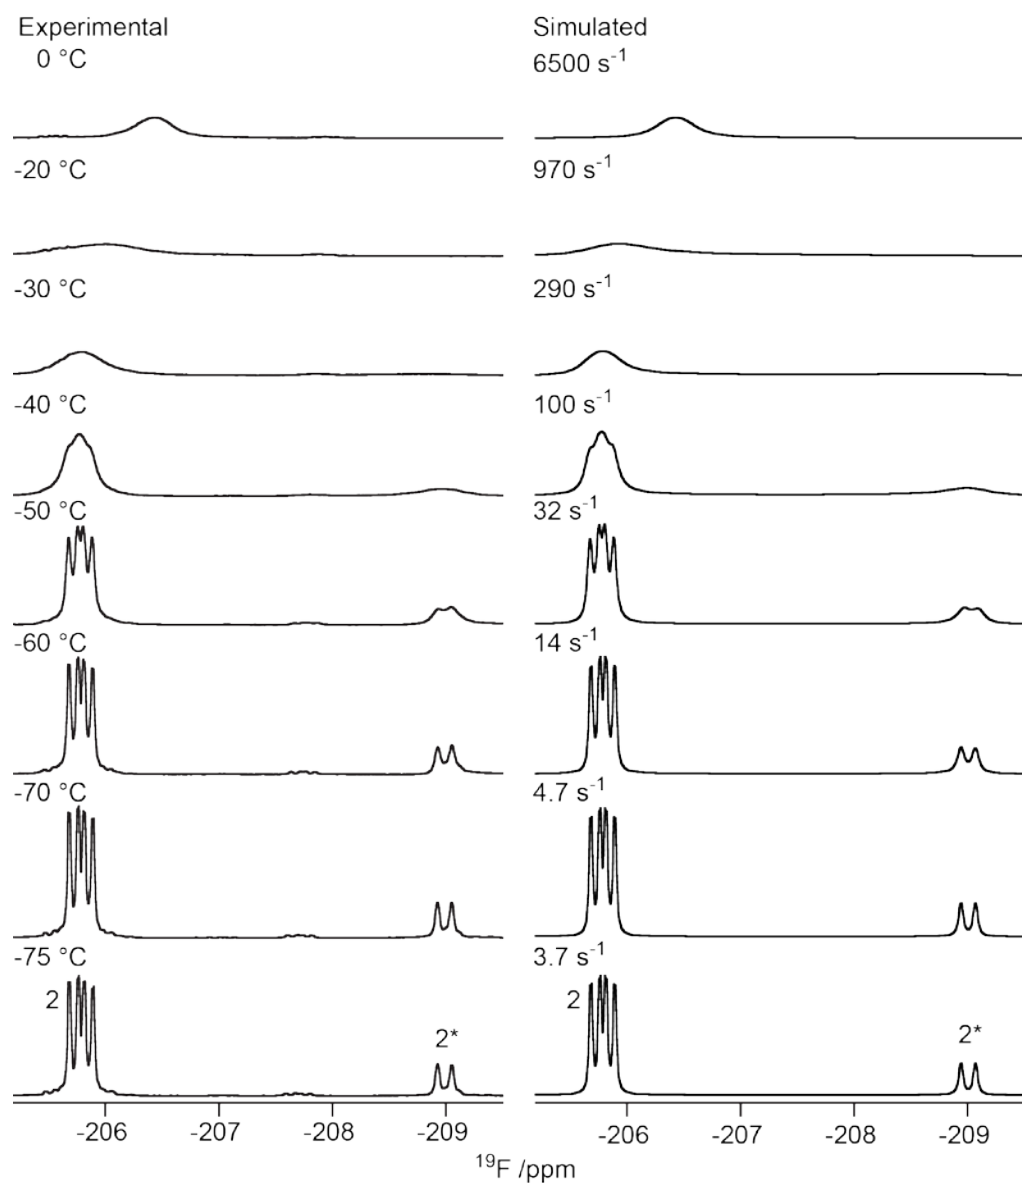

**Figure S4.** Experimental and simulated <sup>19</sup>F NMR spectra of methyl glycoside **6**.

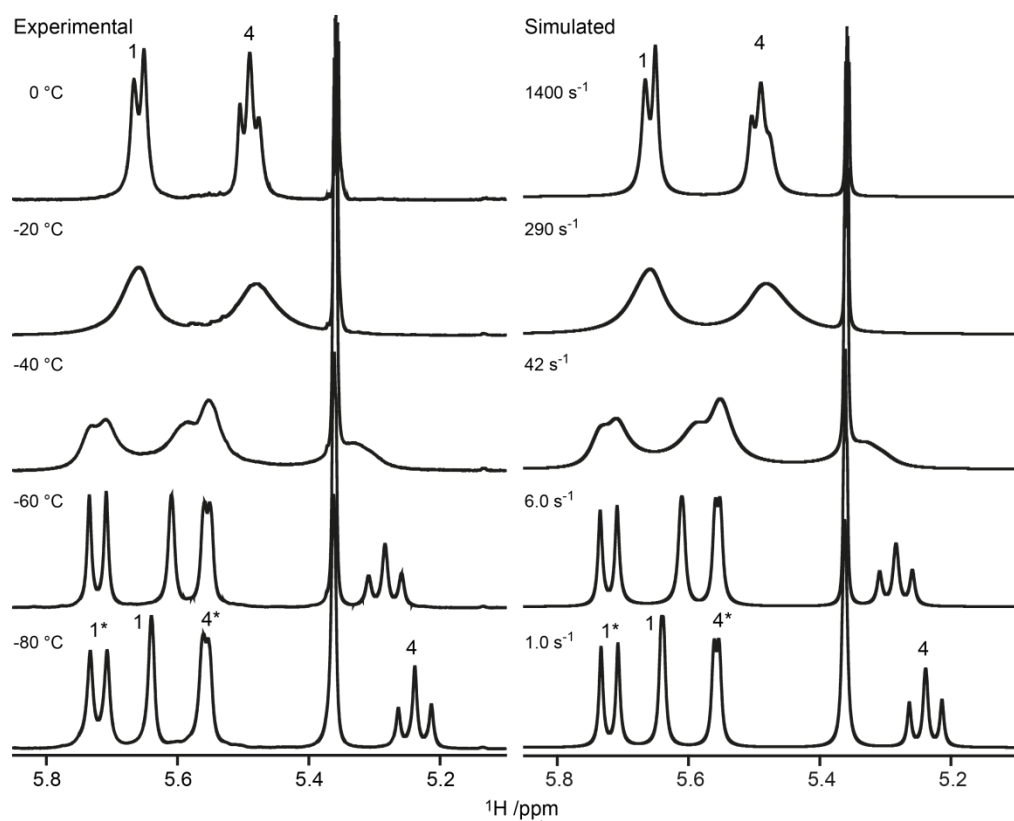

**Figure S5.** Experimental and simulated  $^1\text{H}$  NMR spectra of the H1 and H4 signals of compound **7**. Signals arising from the  $^1\text{C}_4$  conformer are marked with asterisks. The signal at 5.36 ppm originates from residual dichloromethane-*d*.

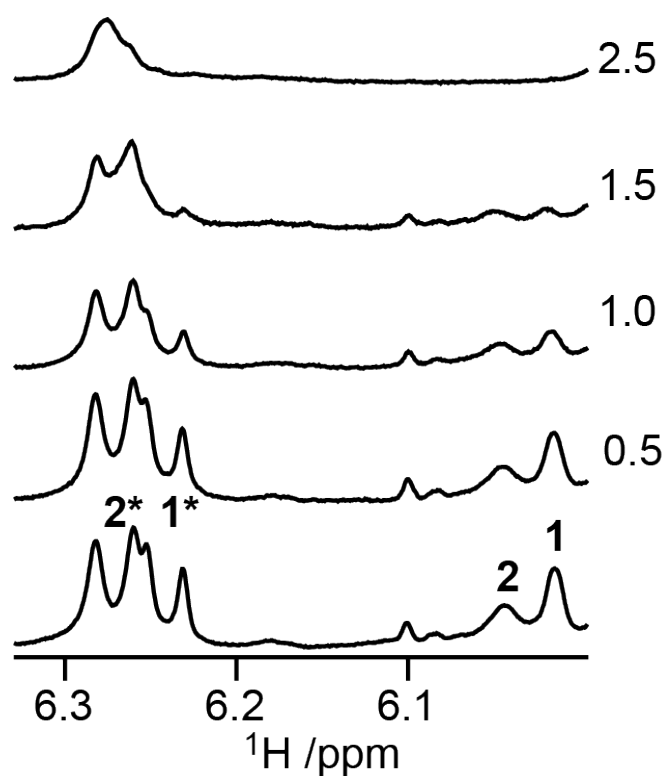

**Figure S6.** Anomeric region of the  $^1\text{H}$  NMR spectra from the competition experiment of anomeric triflates **1** and **2**. The numbers in the right margin denote the number of methanol equivalents added. Signals arising from the  $^1\text{C}_4$  conformer are marked with asterisks.
